1 **Differences in Long-Chained Cuticular Hydrocarbons between Males and Gynes in**  
2 ***Cataglyphis* Desert Ants**

3 SHANI INBAR\*, EYAL PRIVMAN

4 *Department of Evolutionary and Environmental Biology, Institute of Evolution, University of*  
5 *Haifa, Haifa 43498838, Israel*

6 \* Corresponding author: [shaniinbar@gmail.com](mailto:shaniinbar@gmail.com) ORCID identifier 0000-0002-1537-4393

7  
8 **Abstract-**

9 Cuticular hydrocarbons play an important role in chemical communication in social insects,  
10 serving, among other things, as nestmate, gender, dominance and fertility recognition cues. In  
11 ants, however, very little is known about the precopulatory signals cuticular hydrocarbons carry.  
12 These signals may serve as affecting sex pheromones and aphrodisiacs or as reliable signals for  
13 idiosyncratic traits, which indirectly affect sexual selection. In this study, we examined, for the  
14 first time, in the *Cataglyphis* genus, sex-specific variability in cuticular hydrocarbons. We  
15 focused on a species that exhibits split sex-ratio and found significant quantitative differences  
16 between virgin queens and their potential mates. In an analyses of both absolute amounts and  
17 relative amounts, we found different compounds to be significantly displayed on gynes and  
18 drones, suggesting absolute and relative amounts may carry different signals influencing mating  
19 behavior and mate choice. We discuss the possible signals advertised by the non-polar fraction of  
20 these hydrocarbon profiles.

21 **Key Words- *Cataglyphis*, Sexual selection, Sex-specific cuticular hydrocarbons.**

22

## INTRODUCTION

23 While in most animals sexual selection presents itself in many elaborate and colorful ways, in  
24 social insects, pre-mating sexual selection is considered to be limited (Boomsma et al. 2005).

25 And still, there are various mechanisms through which sexual selection acts that have been  
26 demonstrated in social insects, and in ants, most of which are post-mating, such as sperm  
27 selection, use of mating plugs and increased mating frequencies by both males and females (see  
28 overview in Boomsma et al. (2005)). Precopulatory selection in ants, however, is limited to few  
29 cases of male territoriality (Abell et al. 1999; Davidson 1982; Heinze et al. 1998; Kinomura and  
30 Yamauchi 1987; Stuart et al. 1987; Wiernasz et al. 2001) and semiochemical communication  
31 which has been surprisingly understudied (Ayasse et al. 2001).

32 Some studies, however, have shown virgin queens to be advertising sexual receptivity (Reviewed  
33 in Ayasse et al. (2001) and (Hölldobler and Wilson 1990)) and others have identified active  
34 female sex pheromones (*Formica lugubris* in Walter et al. (1993), *Polyergus breviceps* in  
35 Greenberg et al. (2007) and in Greenberg et al. (2018), *Polyergus rufescens* in Castracani et al.  
36 (2005) and in Castracani et al. (2008)). Mandibular, Dufour, poison, and pygidial glands have  
37 also been shown to contain attractants to males (Grasso et al. 2003). In several species, males  
38 have been shown to discharge their mandibular glands during nuptial flights or when leaving the  
39 nest (BENTO et al. 2007; Brand et al. 1973b; Hölldobler 1976; Law et al. 1965) and male  
40 metapleural glands were also suggested to have an active role in sexual selection (Hölldobler and  
41 Engel-Siegel 1984).

42 Cuticular hydrocarbons (CHCs) are likely to play an important role in mating behavior and mate  
43 choice in ants because many other individual and colonial difference such as task (see for

44 example Greene and Gordon (2003)), caste and sex (see for example Campos et al. (2012)),  
45 nestmate recognition (See for example Lahav et al. (1999)) and fertility (See for example  
46 Dietemann et al. (2003)) are advertised by the cuticular chemical coating.

47 Part of the chemical bouquet, displayed on the cuticle, may be active sex pheromones, but it can  
48 also contain signals indicative of other traits which influence mating behavior. In ants, few  
49 studies demonstrated unique sex-specific differences in CHCs between virgin queens (hereafter  
50 gynes) and males (drones). Those studies showed these differences to be either qualitative or  
51 quantitative (Antoniali Junior et al. 2007; Brand et al. 1973a; Chernenko et al. 2012; Cremer et  
52 al. 2002; Cuvillier-Hot et al. 2001; Hojo et al. 2008; Johnson and Sundström 2012; Kureck et al.  
53 2011; Oppelt et al. 2008).

54 To the best of our knowledge, no study examined sexual dimorphism in CHCs in *Cataglyphis*  
55 ants and the mechanisms underlying sexual selection are still unknown in this large genus. In *C.*  
56 *iberica* a mixture of three linear alkanes and methylalkanes (n-C27, nC29 and 3-meC29) has  
57 been suggested to function as queen pheromones but their function was restricted to sterility  
58 inducement rather than male attraction (Van Oystaeyen et al. 2014) and another study found that  
59 gynes produce more undecane in the Dufour's gland than drones (Monnin et al. 2018) but also  
60 suggested it may have functions unrelated to male attraction.

61 Another possible mechanism related to precopulatory sexual selection may involve altering  
62 acceptance threshold making males able to get closer to gynes without being harassed by  
63 workers (Helft et al. 2016; Helft et al. 2015). There is, indeed, evidence of males mimicking the  
64 queen's chemical bouquet in ants, thus allowing them to escape aggression from other males  
65 (Cremer et al. 2002) or from workers (Franks and Hölldobler 1987). Other such acceptance-

66 altering effects have been demonstrated in honeybees where different nestmate recognition  
67 mechanisms are used to identify drones and workers (Moritz and Neumann 2004) enabling males  
68 to immigrate to foreign colonies.

69 Kinship between gynes and males may also influence mate choice. Although it has been argued  
70 that discriminatory abilities are usually limited to nestmate recognition, regardless of kinship  
71 degree (Carlin 1988; Grafen 1990), there is evidence of the influence of kinship on mating  
72 preferences in ants (Keller and Passera 1993). Keller and Passera (1993), in this study, suggested  
73 that colony-derived cues may be of less importance in mating preferences than kinship cues. In  
74 bees, male have also been shown to discriminate between female kin through olfactory signals,  
75 such as CHCs (Smith 1983) suggesting that kinship recognition is, indeed, of importance in mate  
76 choice.

77 CHC may carry other signals which affect pre-mating sexual selection in ants such as overall  
78 fitness of both gynes and males. Body size, in both sexes, is a reliable indicator of fitness and, in  
79 *Pogonomyrmex* harvester ants, for example, larger males have been documented to be more  
80 successful in mating attempts (Abell et al. 1999; Wiernasz et al. 2001; Wiernasz et al. 1995). In  
81 ants, gynes and drones vary significantly in body size, ranging from both sexes being about equal  
82 in size to queens having ~3 times the body length and ~25 times the body mass of males  
83 (Boomsma et al. 2005). *Cataglyphis* ants show significant variability in body size between gynes  
84 and drones.

85 Body size and surface area influence the absolute amounts of CHCs on an individual ant and the  
86 total amount of a component of the cuticular lipid is proportional to it. It is hard to determine  
87 whether a factor in the pheromonal blend is informative because of its absolute amount, its ratio

88 with other chemicals, or both factors combined. Ratios between CHCs are usually less variable  
89 than are the absolute quantities of each hydrocarbon (See for example in *Drosophila* Coyne  
90 (1996)) because ratios are insensitive to body size. The opposite case was also reported, with  
91 higher variability in relative amounts than in total amounts (See for example, also in *Drosophila*  
92 Grillet et al. (2005)). Thus, body size variation in both gynes and drones may play a role in  
93 mating. We, therefore, chose a twofold analysis of the CHCs to account for the possibility of  
94 absolute amounts enhancing differences between gynes and males in ants of the *C. niger* species  
95 complex and also the possibility of them masking differences.

96 To our knowledge, this is the first study to demonstrate sexual dimorphism in CHCs in  
97 *Cataglyphis* and it suggests that ratios between compounds may carry different signals than  
98 absolute amounts.

99

100

## METHODS AND MATERIALS

### 101 **Ants**

102 Gynes and males were collected on the spring of 2016 from colonies dug in Betzet beach on the  
103 northern Israeli coastline (from N33.05162, E35.10245 to N33.07868, E35.10705). This  
104 population was previously described as *C. drusus* (Eyer et al. 2017) but our recent species  
105 delimitation study raised the question of whether *C. drusus* is separate species or is it the same  
106 species as *C. niger*, because these populations are not differentiated by their nuclear genomic  
107 DNA (Reiner-Brodetzki et al. 2018). Colonies of this population are monogyne (headed by a  
108 single queen), polyandrous (queens are multiply mated), and monodomous (single nest per  
109 colony) (Eyer et al. 2017). We recently reported that this population exhibits split sex-ratio

110 allocation, that is, colonies produce either gynes or males but never both sexulas (Inbar and  
111 Privman 2018). Queens usually mate during the spring and sexuals can be found in nests in early  
112 spring. In the present study we used samples from twelve nests, 6 female-producing colonies and  
113 6 male-producing colonies, with 1-3 gynes/drones collected from each colony. All sexuals were  
114 frozen on the same evening of collection.

115

### 116 **Cuticular hydrocarbon analysis:**

117 Whole bodies were individually immersed in hexane, containing 400 ng/ $\mu$ l of tetracosane (C24)  
118 as internal standard. Initial analysis was conducted by gas chromatography/mass spectrometry  
119 (GC/MS), using a VF-5ms capillary column, temperature-programmed from 60°C to 300°C  
120 (with 1 min initial hold) at a rate of 10°C per min, with a final hold of 15 min. Compound were  
121 identified according to their fragmentation pattern and respective retention time compared to  
122 authentic standards. We identified 34 compounds in gynes and the same 34 compounds in  
123 drones. Quantitative analyses were performed by flame ionization gas chromatography  
124 (GC/FID), using the above running conditions. Peak integration was performed using the  
125 program Galaxie Varian 1.9.

126

127

## **RESULTS**

128 Chemical analysis of the non-polar fraction of the cuticular extracts of gynes and drones  
129 identified 34 long-chained CHCs, ranging from pentacosane (c25) to tritriacontane (c33). All 34  
130 compounds were identified in both gynes and drones with no qualitative differences between

131 them (Fig. 1). Quantitative differences between the two groups were examined in two ways: first,  
132 an analysis of absolute quantities calculated relative to an internal standard; second, an analysis  
133 of the percentage of every compound in the total extract, calculated according to percent area in  
134 peak integration (Table 1). Principal component analyses (PCA) of both methods are shown in  
135 Figure 2.

136 Both relative amounts and absolute quantities showed significant differences between CHC  
137 profiles of gynes and drones (In Wilks' Lambda test (Rao's approximation)  $p$ -values were 0.044  
138 and 0.002, for absolute amounts and relative amounts respectively). Relative amounts were less  
139 variable than absolute amounts. In a linear discriminant analysis (LDA) followed by  
140 unidimensional test of equality of the means of the groups, the two analyses showed different  
141 compounds to be significantly discriminating between gynes and drones, namely, four  
142 compounds in the relative amount analysis: C25; 11,15-dime C29; 2-me C30; C31; and 13  
143 compounds in the absolute amounts analysis: 5-me C25; 3-me C25; 10-me C26; 11+13-me C27;  
144 11,15-dime C27; 3-me C27; C28; 11+13-me C29; 3-me C29; 7,11,15-trime C29; C30; 4-me  
145 C30; 13+15-me C31. Only one compound was identified in both analyses - 7,11,15-trime C27  
146 (Table 1).

147

148

149

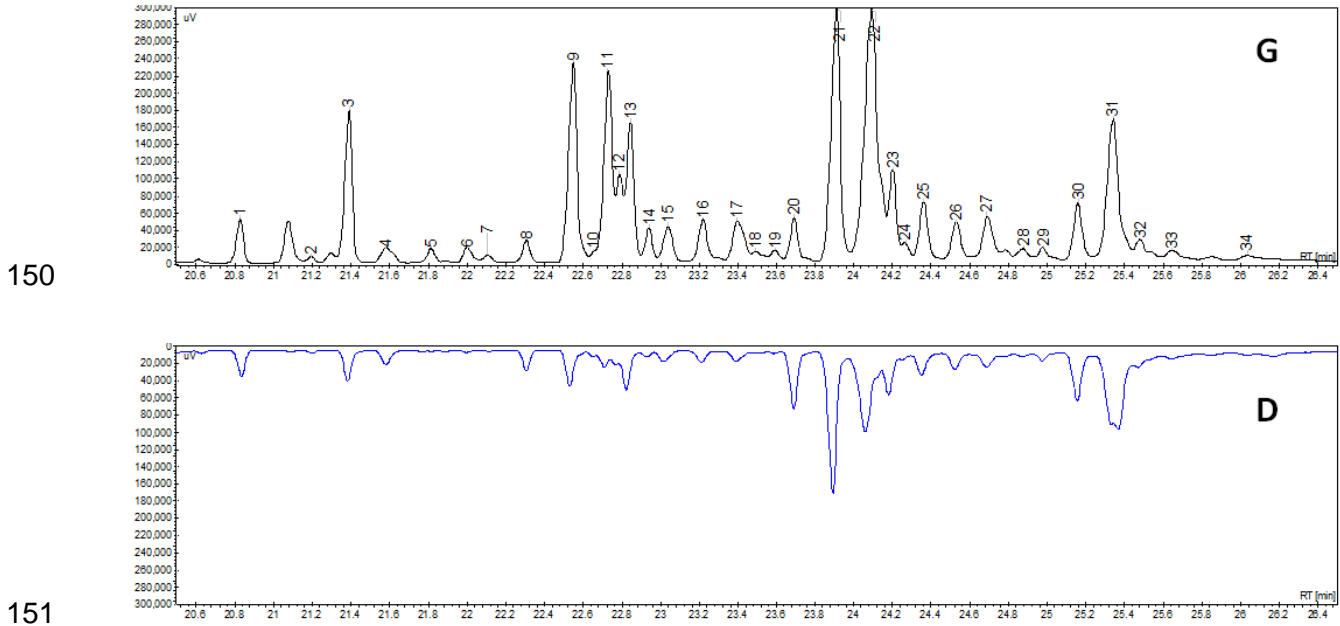

152 **Figure 1:** Chromatograms of CHCs from total body extracts. The upper chromatogram is of a  
153 gyne and the lower of a drone. Only long-chained CHC are shown.

154

155

156

157

158

159

160

161

162



163 **Table 1: Quantification of CHCs of 13 gynes (from 6 colonies) and 10 drones (from 6**  
 164 **colonies)**

|    |                       | Gynes<br>Absolute quantity<br>(ng)       | Gynes<br>% of total<br>secretion | P- Value | Drones<br>Absolute quantity<br>(ng)    | Drones<br>% of total<br>secretion | P- Value |
|----|-----------------------|------------------------------------------|----------------------------------|----------|----------------------------------------|-----------------------------------|----------|
| 1  | c25                   | 1169.10±780.33<br>(239.73 - 3288.89)     | 1.80±0.66<br>(1.14 - 3.45)       |          | 865.49±1345.39<br>(78.36 - 4512.50)    | 2.74±0.93<br>(1.37 - 3.96)        | 0.010    |
| 2  | 5me c25               | 108.92±104.41<br>(24.66 - 400.00)        | 0.15±0.06<br>(0.07 - 0.27)       | 0.046    | 69.43±69.84<br>(1.51 - 237.50)         | 0.38±0.42<br>(0.01 - 1.40)        |          |
| 3  | 3me c25               | 4040.73±4316.35<br>(528.77 - 17266.67)   | 5.27±1.65<br>(3.37 - 8.14)       | 0.006    | 1083.44±879.80<br>(181.29 - 3112.50)   | 5.17±2.73<br>(2.49 - 9.12)        |          |
| 4  | c26                   | 768.13±363.13<br>(363.01 - 1577.78)      | 1.35±0.59<br>(0.71 - 2.67)       |          | 311.59±333.96<br>(31.83 - 912.94)      | 1.21±0.59<br>(0.49 - 2.23)        |          |
| 5  | 10me c26              | 286.50±373.59<br>(17.81 - 1422.22)       | 0.33±0.18<br>(0.10 - 0.64)       | 0.024    | 35.19±33.87<br>(5.26 - 115.94)         | 0.22±0.18<br>(0.02 - 0.46)        |          |
| 6  | 4me c26               | 401.26±408.87<br>(67.12 - 1622.22)       | 0.53±0.13<br>(0.35 - 0.73)       |          | 83.34±61.54<br>(9.00 - 187.50)         | 0.42±0.26<br>(0.14 - 0.86)        |          |
| 7  | 4,12 dime c26         | 171.95±161.97<br>(20.55 - 622.22)        | 0.22±0.06<br>(0.15 - 0.30)       |          | 44.34±38.63<br>(7.61 - 137.50)         | 0.20±0.10<br>(0.11 - 0.43)        |          |
| 8  | c27                   | 822.32±408.46<br>(298.63 - 1844.44)      | 1.38±0.43<br>(0.68 - 2.20)       |          | 1170.72±2631.94<br>(84.43 - 8587.50)   | 2.33±1.70<br>(0.79 - 6.89)        |          |
| 9  | 11+13 me c27          | 6150.91±6536.77<br>(702.74 - 25200.00)   | 7.72±2.67<br>(4.72 - 11.36)      | 0.038    | 1425.94±1218.75<br>(147.40 - 4100.00)  | 6.49±3.42<br>(2.27 - 11.21)       |          |
| 10 | 5me c27               | 70.74±56.68<br>(11.94 - 222.22)          | 0.12±0.08<br>(0.02 - 0.28)       |          | 26.88±30.06<br>(0.92 - 100.00)         | 0.12±0.08<br>(0.01 - 0.26)        |          |
| 11 | 11,15 dime c27        | 2254.88±3164.19<br>(95.89 - 11311.11)    | 2.44±2.09<br>(0.69 - 6.54)       | 0.011    | 373.00±415.91<br>(3.46 - 1405.80)      | 2.00±2.16<br>(0.06 - 5.32)        |          |
| 12 | 7,11 dime c27         | 475.86±448.06<br>(60.27 - 1785.71)       | 0.72±0.41<br>(0.15 - 1.51)       |          | 73.76±65.60<br>(4.84 - 220.38)         | 0.44±0.42<br>(0.07 - 1.50)        |          |
| 13 | 3me c27               | 2017.75±1746.58<br>(445.21 - 7133.33)    | 2.85±0.55<br>(1.85 - 3.39)       | 0.004    | 924.67±1204.11<br>(131.58 - 4137.50)   | 3.31±0.66<br>(2.42 - 4.43)        |          |
| 14 | 7,11,15 trime<br>c27  | 675.95±521.63<br>(83.56 - 1888.89)       | 0.93±0.18<br>(0.62 - 1.32)       | 0.021    | 124.08±100.80<br>(6.23 - 312.50)       | 0.63±0.36<br>(0.10 - 1.02)        | 0.016    |
| 15 | c28                   | 1327.92±956.33<br>(301.37 - 3666.67)     | 1.93±0.21<br>(1.65 - 2.36)       | 0.011    | 470.54±589.69<br>(71.97 - 2062.50)     | 1.76±0.39<br>(1.11 - 2.47)        |          |
| 16 | 12me c28              | 1652.54±1337.81<br>(272.60 - 5044.44)    | 2.27±0.34<br>(1.81 - 3.14)       |          | 421.62±395.33<br>(59.52 - 1387.50)     | 1.83±0.65<br>(0.92 - 2.94)        |          |
| 17 | 4me+ 8,12 dime<br>c28 | 1701.79±1448.09<br>(304.11 - 5666.67)    | 2.31±0.18<br>(2.01 - 2.65)       |          | 393.80±344.16<br>(56.75 - 1187.50)     | 1.79±0.65<br>(0.87 - 2.58)        |          |
| 18 | 2me c28               | 60.12±45.04<br>(14.93 - 155.56)          | 0.09±0.04<br>(0.04 - 0.15)       |          | 25.03±33.88<br>(3.46 - 100.00)         | 0.08±0.03<br>(0.05 - 0.16)        |          |
| 19 | 4,12 dime c28         | 200.57±162.33<br>(32.88 - 577.78)        | 0.28±0.04<br>(0.22 - 0.35)       |          | 32.42±25.33<br>(9.69 - 98.55)          | 0.20±0.11<br>(0.02 - 0.34)        |          |
| 20 | c29                   | 1350.87±663.95<br>(334.38 - 2444.44)     | 2.36±1.16<br>(0.90 - 4.50)       |          | 3601.76±8320.86<br>(155.76 - 26875.00) | 6.09±6.17<br>(1.21 - 21.57)       |          |
| 21 | 11+13 me c29          | 12893.58±9321.57<br>(2461.64 - 35444.44) | 18.38±1.78<br>(15.05 - 21.01)    | 0.014    | 5024.77±6563.04<br>(803.51 - 22350.00) | 17.31±1.98<br>(14.32 - 20.82)     |          |
| 22 | 11,15 dime c29        | 8757.70±6757.88<br>(66.67 - 26628.57)    | 14.38±5.04<br>(0.03 - 19.07)     |          | 2583.85±2871.68<br>(532.75 - 10000.00) | 10.30±2.02<br>(7.21 - 14.51)      | 0.025    |
| 23 | 3me c29               | 4347.20±10298.52<br>(575.00 - 38511.11)  | 3.86±4.14<br>(1.57 - 17.36)      | 0.014    | 864.98±981.86<br>(182.46 - 3000.00)    | 3.26±0.78<br>(2.30 - 4.96)        |          |
| 24 | 7,11,15 trime<br>c29  | 96.00±86.39<br>(6.25 - 314.29)           | 0.13±0.06<br>(0.02 - 0.22)       | 0.025    | 20.99±18.17<br>(4.61 - 66.67)          | 0.12±0.07<br>(0.02 - 0.23)        |          |
| 25 | c30                   | 2255.41±1856.09<br>(494.52 - 6977.78)    | 3.10±0.46<br>(2.04 - 3.78)       | 0.018    | 712.55±873.58<br>(178.55 - 3050.00)    | 2.73±0.40<br>(2.15 - 3.38)        |          |
| 26 | 14 me c30             | 1755.93±1438.75<br>(287.67 - 5355.56)    | 2.37±0.25<br>(1.93 - 2.67)       |          | 514.17±593.81<br>(141.94 - 2075.00)    | 2.06±0.48<br>(1.46 - 2.72)        |          |
| 27 | 4 me c30              | 1773.93±1566.14<br>(353.42 - 5911.11)    | 2.37±0.36<br>(1.62 - 2.79)       | 0.017    | 432.60±407.25<br>(145.62 - 1437.50)    | 1.95±0.52<br>(1.15 - 2.70)        |          |
| 28 | 2 me c30              | 311.34±321.04<br>(63.01 - 1177.78)       | 0.40±0.10<br>(0.21 - 0.56)       |          | 45.75±33.89<br>(18.43 - 113.04)        | 0.26±0.13<br>(0.07 - 0.45)        | 0.011    |
| 29 | c31                   | 276.17±165.32<br>(31.25 - 566.15)        | 0.51±0.36<br>(0.10 - 1.17)       |          | 562.24±1278.31<br>(19.35 - 4150.00)    | 1.14±0.91<br>(0.16 - 3.33)        | 0.035    |
| 30 | 13+15 me c31          | 3413.97±2341.85<br>(709.59 - 8400.00)    | 4.96±1.15<br>(3.05 - 6.66)       | 0.019    | 2003.26±3378.76<br>(251.61 - 11262.50) | 6.12±2.88<br>(2.85 - 10.66)       |          |
| 31 | 11,15 dime c31        | 9198.67±6728.53<br>(2210.96 - 24933.33)  | 13.32±3.24<br>(7.79 - 18.57)     |          | 3385.37±3031.83<br>(985.26 - 9477.65)  | 16.09±7.76<br>(6.15 - 30.50)      |          |
| 32 | 7,11,15 trime<br>c31  | 439.66±366.76<br>(65.63 - 1333.33)       | 0.62±0.20<br>(0.21 - 0.89)       |          | 95.61±106.64<br>(18.43 - 375.00)       | 0.50±0.33<br>(0.07 - 1.02)        |          |
| 33 | c32                   | 392.66±421.94<br>(41.18 - 1400.00)       | 0.49±0.24<br>(0.07 - 0.86)       |          | 133.82±114.07<br>(23.96 - 375.00)      | 0.69±0.49<br>(0.28 - 1.75)        |          |
| 34 | c33                   | 8.60±11.22<br>(0.00 - 42.86)             | 0.05±0.11<br>(0.00 - 0.41)       |          | 20.65±34.13<br>(0.00 - 112.50)         | 0.08±0.11<br>(0.00 - 0.37)        |          |

165  
166

Means ± Standard deviation are shown and ranges are given in parentheses.

167 (A)

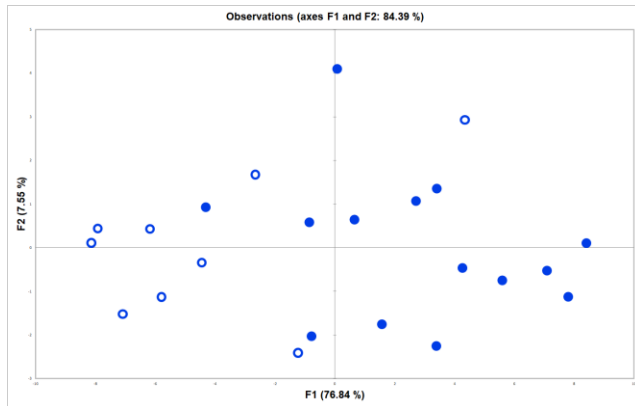

168

169 (B)

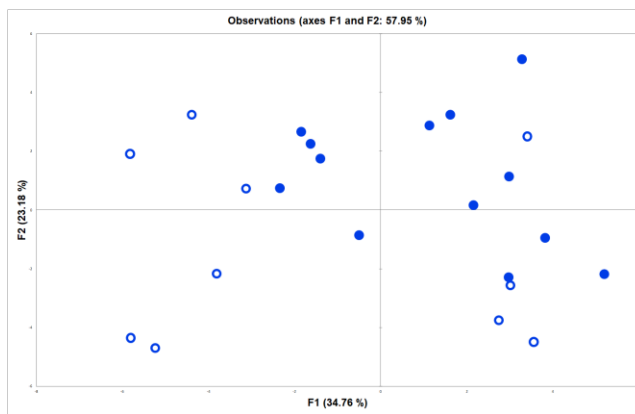

170

171 **Figure 2:** Principal component analysis (PCA). (A) Absolute quantities; (B) percent of total  
172 extract. Filled blue points represent individual observations of gynes and empty points of drones.

173

174

175

176

177

178  
179  
180  
181  
182  
183  
184  
185  
186  
187  
188  
189  
190  
191  
192  
193  
194  
195  
196  
197  
198  
199

## DISCUSSION

Our study reveals differences in long-chained CHCs between drones and gynes in a population of *Cataglyphis* colonies that display split-sex ratios. The differences were quantitative and not qualitative, and different compounds stand out in a discriminant analysis when considering either relative amounts or absolute amounts. The two analyses revealed different compounds to be significantly discriminating virgin queens and their potential mates.

Two main issues can be addressed in light of our results:

First, although bioassays are needed in order to demonstrate active sex pheromones, the robust differences between gynes and drones suggest that CHCs carry signals related to mating. These chemical cues may play different roles such as altering acceptance threshold, acting as reliable signals of fitness and fertility or kinship. Our results also show that there is an abundance of branched hydrocarbons in the CHC coating of both gynes and drones and it is known that such compounds reduce the waterproofing efficacy of the cuticle (Gibbs and Pomonis 1995). This reduced efficiency may, therefore, also play a role in signaling fitness, through the handicap principle (Heinze and d'Ettorre 2009; Zahavi and Zahavi 1999) as it has been suggested before (Boulay et al. 2017).

Second, we have shown that it is important to analyze both total amounts and relative amounts. Our study showed them both to be significantly different between gynes and drones. Absolute and relative amounts may carry distinct cues; Absolute quantities may be indicative of body size, carrying signals of overall fitness and fertility, while relative amount may be cues for kinship. Therefore, it is not unlikely that both absolute quantities and relative amounts influence mate choice and mating behavior and that both males and gynes integrate multiple cues. We

200 encourage future studies to account for both factors and hope that future bio-assays will help  
201 identify specific sex pheromones as well as other signals affecting sexual behavior and mating in  
202 the *Cataglyphis* genus.

203

## 204 **Acknowledgement**

205 E.P. was supported by Israel Science Foundation Grants no. 646/15, 2140/15, and 2155/15 and  
206 US-Israel Binational Science Foundation Grant no. 2013408

207

208

## REFERENCES

- 209 Abell AJ, Cole BJ, Reyes R, Wiernasz DC (1999) Sexual selection on body size and  
210 shape in the western harvester ant, *Pogonomyrmex occidentalis* Cresson  
211 *Evolution* 53:535-545
- 212 Antonialli Junior W, Lima S, Andrade L, Suárez Y (2007) Comparative study of the  
213 cuticular hydrocarbon in queens, workers and males of *Ectatomma vizottoi*  
214 (Hymenoptera, Formicidae) by Fourier transform-infrared photoacoustic  
215 spectroscopy *Genetics and Molecular Research* 6:492-499
- 216 Ayasse M, Paxton R, Tengö J (2001) Mating behavior and chemical communication in  
217 the order Hymenoptera *Annual review of entomology* 46:31-78
- 218 BENTO JMS, DELLA LUCIA TM, Do Nascimento RR, Bergmann J, Morgan ED (2007)  
219 Response of workers of *Atta sexdens rubropilosa* (Hymenoptera: Formicidae) to  
220 mandibular gland compounds of virgin males and females *Physiological*  
221 *entomology* 32:283-286
- 222 Boomsma JJ, Baer B, Heinze J (2005) The evolution of male traits in social insects  
223 *Annu Rev Entomol* 50:395-420
- 224 Boulay R, Aron S, Cerdá X, Doums C, Graham P, Hefetz A, Monnin T (2017) Social life  
225 in arid environments: the case study of *Cataglyphis* ants *Annual review of*  
226 *entomology* 62:305-321
- 227 Brand J, Duffield R, MacConnell J, Blum M, Fales H (1973a) Caste-specific compounds  
228 in male carpenter ants *Science* 179:388-389
- 229 Brand J, Fales H, Sokoloski E, MacConnell J, Blum M, Duffield R (1973b) Identification  
230 of mellein in the mandibular gland secretions of carpenter ants *Life sciences*  
231 13:201-211

- 232 Campos MCG, Campos MLG, Turatti IC, Nascimento FS (2012) Cuticular hydrocarbon  
233 variation of castes and sex in the weaver ant *Camponotus textor* (Hymenoptera:  
234 Formicidae) *Sociobiology* 59:1025
- 235 Carlin NF (1988) Discrimination between and within colonies of social insects: two null  
236 hypotheses *Netherlands Journal of Zoology* 39:86-100
- 237 Castracani C et al. (2008) Chemical communication in mating behaviour of the slave-  
238 making ant *Polyergus rufescens* (Hymenoptera, Formicidae): 3-ethyl-4-  
239 methylpentanol as a critical component of the queen sex pheromone *Insectes*  
240 *socialis* 55:137-143
- 241 Castracani C et al. (2005) Behavioral bioassays testing the methyl 6-methylsalicylate as  
242 a component of the female sex pheromone in the slave-making ant *Polyergus*  
243 *rufescens* (Hymenoptera, Formicidae) *Journal of insect behavior* 18:685-692
- 244 Chernenko A, Holman L, Helanterä H, Sundström L (2012) Cuticular chemistry of males  
245 and females in the ant *Formica fusca* *Journal of chemical ecology* 38:1474-1482
- 246 Coyne JA (1996) Genetics of a difference in male cuticular hydrocarbons between two  
247 sibling species, *Drosophila simulans* and *D. sechellia* *Genetics* 143:1689-1698
- 248 Cremer S, Sledge MF, Heinze J (2002) Chemical mimicry: male ants disguised by the  
249 queen's bouquet *Nature* 419:897
- 250 Cuvillier-Hot V, Cobb M, Malosse C, Peeters C (2001) Sex, age and ovarian activity  
251 affect cuticular hydrocarbons in *Diacamma ceylonense*, a queenless ant *Journal*  
252 *of Insect Physiology* 47:485-493
- 253 Davidson DW (1982) Sexual selection in harvester ants (Hymenoptera: Formicidae:  
254 *Pogonomyrmex*) *Behavioral Ecology and Sociobiology* 10:245-250
- 255 Dietemann V, Peeters C, Liebig J, Thivet V, Hölldobler B (2003) Cuticular hydrocarbons  
256 mediate discrimination of reproductives and nonreproductives in the ant  
257 *Myrmecia gulosa* *Proceedings of the National Academy of Sciences* 100:10341-  
258 10346
- 259 Eyer P, Seltzer R, Reiner-Brodetzki T, Hefetz A (2017) An integrative approach to  
260 untangling species delimitation in the *Cataglyphis bicolor* desert ant complex in  
261 Israel *Molecular phylogenetics and evolution* 115:128-139
- 262 Franks NR, Hölldobler B (1987) Sexual competition during colony reproduction in army  
263 ants *Biological Journal of the Linnean Society* 30:229-243
- 264 Gibbs A, Pomonis JG (1995) Physical properties of insect cuticular hydrocarbons: the  
265 effects of chain length, methyl-branching and unsaturation *Comparative*  
266 *Biochemistry and Physiology Part B: Biochemistry and Molecular Biology*  
267 112:243-249
- 268 Grafen A (1990) Do animals really recognize kin? *Animal Behaviour* 39:42-54
- 269 Grasso DA, Visicchio R, Castracani C, Mori A, Le Moli F (2003) The mandibular glands  
270 as a source of sexual pheromones in virgin queens of *Polyergus rufescens*  
271 (Hymenoptera, Formicidae) *Italian Journal of Zoology* 70:229-232
- 272 Greenberg L, Johnson CA, Trager JC, McElfresh JS, Rodstein J, Millar JG (2018) Sex  
273 Attractant Pheromones of Virgin Queens of Sympatric Slave-Making Ant Species  
274 in the Genus *Polyergus*, and their Possible Roles in Reproductive Isolation  
275 *Journal of chemical ecology*:1-9

- 276 Greenberg L, Tröger AG, Francke W, McElfresh JS, Topoff H, Aliabadi A, Millar JG  
277 (2007) Queen sex pheromone of the slave-making ant, *Polyergus breviceps*  
278 *Journal of chemical ecology* 33:935-945
- 279 Greene MJ, Gordon DM (2003) Social insects: cuticular hydrocarbons inform task  
280 decisions *Nature* 423:32
- 281 Grillet M, Dartevelle L, Ferveur J-F (2005) A *Drosophila* male pheromone affects female  
282 sexual receptivity *Proceedings of the Royal Society B: Biological Sciences*  
283 273:315-323
- 284 Heinze J, d'Ettorre P (2009) Honest and dishonest communication in social  
285 Hymenoptera *Journal of Experimental Biology* 212:1775-1779
- 286 Heinze J, Hölldobler B, Yamauchi K (1998) Male competition in *Cardiocondyla* ants  
287 *Behavioral ecology and sociobiology* 42:239-246
- 288 Helft F, Doums C, Monnin T (2016) No evidence of pre-copulatory mate choice by  
289 gynes in the facultatively parthenogenetic ant *Cataglyphis cursor* *Insectes*  
290 *sociaux* 63:199-201
- 291 Helft F, Monnin T, Doums C (2015) First evidence of inclusive sexual selection in the  
292 ant *Cataglyphis cursor*: worker aggressions differentially affect male access to  
293 virgin queens *Ethology* 121:641-650
- 294 Hojo MK, Wada-Katsumata A, Akino T, Yamaguchi S, Ozaki M, Yamaoka R (2008)  
295 Chemical disguise as particular caste of host ants in the ant inquiline parasite  
296 *Niphanda fusca* (Lepidoptera: Lycaenidae) *Proceedings of the Royal Society B:*  
297 *Biological Sciences* 276:551-558
- 298 Hölldobler B (1976) The behavioral ecology of mating in harvester ants (Hymenoptera:  
299 Formicidae: Pogonomyrmex) *Behavioral Ecology and Sociobiology* 1:405-423
- 300 Hölldobler B, Engel-Siegel H (1984) On the metapleural gland of ants *Psyche: A Journal*  
301 *of Entomology* 91:201-224
- 302 Hölldobler B, Wilson EO (1990) *The ants*. Harvard University Press,
- 303 Inbar S, Privman E (2018) Split sex-ratio and variability in aggressive behavior in the ant  
304 *Cataglyphis niger* [bioRxiv:478552](https://doi.org/10.1101/478552)
- 305 Johnson CA, Sundström L Cuticular chemistry of two social forms in a facultatively  
306 polygyne ant (Hymenoptera: Formicidae: *Formica truncorum*). In: *Annales*  
307 *Zoologici Fennici*, 2012. JSTOR, pp 1-17
- 308 Keller L, Passera L (1993) Incest avoidance, fluctuating asymmetry, and the  
309 consequences of inbreeding in *Iridomyrmex humilis*, an ant with multiple queen  
310 colonies *Behavioral Ecology and Sociobiology* 33:191-199
- 311 Kinomura K, Yamauchi K (1987) Fighting and mating behaviors of dimorphic males in  
312 the ant *Journal of Ethology* 5:75-81
- 313 Kureck IM, Neumann A, Foitzik S (2011) Wingless ant males adjust mate-guarding  
314 behaviour to the competitive situation in the nest *Animal behaviour* 82:339-346
- 315 Lahav S, Soroker V, Hefetz A, Vander Meer RK (1999) Direct behavioral evidence for  
316 hydrocarbons as ant recognition discriminators *Naturwissenschaften* 86:246-249
- 317 Law JH, Wilson EO, McCloskey JA (1965) Biochemical polymorphism in ants *Science*  
318 149:544-545
- 319 Monnin T, Helft F, Leroy C, d'Ettorre P, Doums C (2018) Chemical characterization of  
320 young virgin queens and mated egg-laying queens in the ant *Cataglyphis cursor*:

- 321 random forest classification analysis for multivariate datasets *Journal of chemical*  
322 *ecology* 44:127-136
- 323 Moritz RF, Neumann P (2004) Differences in nestmate recognition for drones and  
324 workers in the honeybee, *Apis mellifera* (L.) *Animal behaviour* 67:681-688
- 325 Oppelt A, Spitzenpfeil N, Kroiss J, Heinze J (2008) The significance of intercolonial  
326 variation of cuticular hydrocarbons for inbreeding avoidance in ant sexuals  
327 *Animal Behaviour* 76:1029-1034
- 328 Reiner-Brodetzki T, Inbar S, Cohen P, Aron S, Privman E, Hefetz A (2018) Incipient  
329 species or social polymorphism? Diversity in the desert ant *Cataglyphis*  
330 *bioRxiv:501270*
- 331 Smith BH (1983) Recognition of female kin by male bees through olfactory signals  
332 *Proceedings of the national Academy of Sciences* 80:4551-4553
- 333 Stuart R, Francoeur A, Loiselle R (1987) Lethal fighting among dimorphic males of the  
334 ant, *Cardiocondyla wroughtonii* *Naturwissenschaften* 74:548-549
- 335 Van Oystaeyen A et al. (2014) Conserved class of queen pheromones stops social  
336 insect workers from reproducing *Science* 343:287-290
- 337 Walter F et al. (1993) Identification of the sex pheromone of an ant, *Formica lugubris*  
338 (Hymenoptera, Formicidae) *Naturwissenschaften* 80:30-34
- 339 Wiernasz DC, Sater AK, Abell AJ, Cole BJ (2001) Male size, sperm transfer, and colony  
340 fitness in the western harvester ant, *Pogonomyrmex occidentalis* *Evolution*  
341 55:324-329
- 342 Wiernasz DC, Yencharis J, Cole BJ (1995) Size and mating success in males of the  
343 western harvester ant, *Pogonomyrmex occidentalis* (Hymenoptera: Formicidae)  
344 *Journal of insect behavior* 8:523-531
- 345 Zahavi A, Zahavi A (1999) *The handicap principle: A missing piece of Darwin's puzzle.*  
346 Oxford University Press,
- 347
